1 Maternal health in rural Pakistan: An analysis of  
2 knowledge and practices of antenatal care using the  
3 socio-ecological model.

4  
5 Nadia Agha<sup>1#a</sup>, Rahim Dad Rind<sup>1#a</sup>, Shoukat Ali Mahar<sup>2#b</sup>, Moomal Mendhri Channa<sup>3#c</sup>, Fizza Ansar<sup>4</sup>, Sadiq  
6 Bhanbhro<sup>4#e\*</sup>

7 <sup>1</sup>Department of Sociology, Shah Abdul Latif University, Khairpur, Sindh, Pakistan

8 <sup>2</sup>Department of Public Administration, Shah Abdul Latif University, Khairpur, Sindh, Pakistan

9 <sup>3</sup>Institute of Gender Studies, Shah Abdul Latif University, Khairpur, Sindh, Pakistan

10 <sup>4</sup>Department of Community Health Sciences, Aga Khan University, Karachi

11 <sup>5</sup>Centre for Applied Health and Social Care Research, Sheffield Hallam University, United Kingdom

12 <sup>#a</sup>Current Address: Department of Sociology, Shah Abdul Latif University, Khairpur, Sindh, Pakistan

13 <sup>#b</sup>Current Address: Department of Public Administration, Shah Abdul Latif University, Khairpur, Sindh, Pakistan

14 <sup>#c</sup>Current Address: Institute of Gender Studies, Shah Abdul Latif University, Khairpur, Sindh, Pakistan

15 <sup>#e</sup>Current Address: Centre for Applied Health and Social Care Research, College of Health, Wellbeing and Life  
16 Sciences, Robert Winston Building, Collegiate Campus, Sheffield Hallam University, UK.

17 \*Corresponding author

18 Email: [s.bhanbhro@shu.ac.uk](mailto:s.bhanbhro@shu.ac.uk)

19 All authors contributed equally to this work.

20

## 21 **Abstract**

### 22 **Background**

23 Pakistan carries a heavy burden of maternal and child health vulnerabilities. Maternal health can  
24 be prevented with culturally specific interventions and women's enhanced access to healthcare  
25 facilities, yet women in rural areas in Pakistan are deprived of such interventions. In this study,  
26 we assessed the prevalent knowledge and practices of antenatal care and the impact of low-  
27 income and gender inequalities on maternal health in rural areas of Pakistan.

### 28 **Method**

29 We conducted a cross-sectional study using the Socio-Ecological Model (SEM) in five villages  
30 in the Sindh province of Pakistan. We tested hypotheses using descriptive reliability and  
31 regression techniques.

### 32 **Results**

33 Findings show that the socio-geographical and cultural factors influencing maternal health were  
34 embedded within the different levels of SEM. The prevalence of Maternal Health Vulnerabilities  
35 (MHV) was high in villages where women had limited literacy and awareness. Of the 352  
36 participants, 173 (49%) women were not literate and could not read pregnancy-related  
37 information imparted through leaflets or brochures. Data showed that women consumed less  
38 milk, multivitamins, and proper food due to poverty. At the same time, they had restricted access  
39 to health facilities: 119 (34%) women had lost their babies after birth. In this study, poverty and  
40 gender inequality correlate with MHV (significant 65.60% and .000 and 10.50% and .000,  
41 respectively) and exacerbate the situation by complementing each other.

## 42 **Conclusion**

43 Culturally appropriate and evidence-based interventions are needed to reduce gender inequality  
44 and prioritise women’s and girls’ maternal health needs. This study has considered cultural,  
45 social, geographical, and economic factors influencing maternal health. It provides a nuanced  
46 account of a complex web of barriers to attaining Sustainable Development Goals (SDGs),  
47 particularly goals 3, ‘Good health and well-being’ and 5 ‘, Gender equality’.

48 **Keywords:** Maternal health, Antenatal care, poverty, gender inequality, Pakistan, Socio-  
49 Ecological Model (SEM)

50

## 51 **Introduction**

### 52 **Background**

53 Maternal and child mortality is a crucial health challenge prevailing in many low and  
54 middle-income countries (LMICs) [1]. Worldwide, around 800 women died every day in 2020  
55 from pregnancy and childbirth-related complications [2], making the global Maternal Mortality  
56 Rate (MMR) 216 deaths per 100,000 births [3]. It is estimated that 94% of maternal mortality  
57 occurs in LMICs [4].

58 Globally, South Asia and Sub-Saharan African countries carry the burden of maternal deaths [5].  
59 Maternal mortality in these regions reached up to 87% of the total global burden [2]. About 80%  
60 of these cases could have been prevented if women were given access to basic healthcare  
61 facilities [6]. Pakistan is one of the leading South Asian countries in terms of high MMR [7]. It

62 carries a more significant burden of maternal, foetal and child mortality rates [8]. The MMR in  
63 Pakistan is 186 deaths per 100,000 live births, which is 26% higher in rural than in urban areas  
64 [9].

65 There are myriad factors contributing to maternal and perinatal health vulnerabilities. The  
66 leading factors of pregnancy-related mortality and morbidity are low household income, low  
67 education, poor healthcare services, gender-based disparities, socio-cultural values, more  
68 considerable distance, malnutrition, unfair resource distribution and political environment. These  
69 are significant indicators for rising maternal mortality cases in rural areas [7]. Unmet nutritional  
70 needs, heavy physical labour, infections, and some other primary chronic conditions like being  
71 overweight and diabetes further deteriorate pregnancy outcomes [10].

72 Maternal mortality can be prevented with access to increased professionally delivered  
73 interventions, more specifically, coverage of crucial obstetric care, access to safe abortion  
74 services, active management during the third stage of labour and the application of  
75 anticonvulsants for women with pre-eclampsia [11]. The knowledge and implementation of  
76 Antenatal Care (ANC) can save the lives of many women. For this, routine antenatal nutrition,  
77 maternal and foetal checkups, preventive measures, intervention for managing common  
78 physiologic symptoms in pregnancy, and health-related interventions significantly improve the  
79 quality of ANC and its utilisation [12].

80 Pakistan is a signatory of the Sustainable Development Goals (SDGs) Agenda 2030, but it still  
81 lags as the MMR is higher in rural settings. The quality of healthcare is a crucial concern for the  
82 coverage of universal health and equity and for reducing the occurrence of maternal and newborn  
83 mortalities [13]. National programmes and interventions often fail due to distance and poor  
84 infrastructure, more specifically for the people living in rural areas [14]. Therefore, it is essential

85 to understand the existing ANC practices that lead to Maternal Health Vulnerabilities (MHV),  
86 particularly in less privileged areas. This study was designed to understand how poverty and  
87 gender inequality influence maternal health outcomes in rural areas of Pakistan and to suggest  
88 the areas where interventions are needed. This is a quantitative study on women of reproductive  
89 age that assesses the existing ANC-related practices, women's access to healthcare services, and  
90 the barriers they experience in accessing these services in rural areas in Sindh, Pakistan.

91 We aimed to identify socio-cultural and geographical barriers to maternal health in rural areas of  
92 Sindh. Research in these areas has not explored and analysed these factors. The study sought to  
93 evaluate the prevalent knowledge and practices of antenatal care and the impact of low-income  
94 and gender inequality on maternal health in rural areas of Pakistan.

## 95 **Methods**

96 This is a cross-sectional study exploring MHV in underserved areas of Sindh. The study  
97 was conducted between November 2023 and mid-February 2024 in five villages of Taluka  
98 Sukkur. A random sampling technique was used to select households in the villages. We  
99 recorded the recent and ongoing ANC practices followed by rural women and how their  
100 household income and gender inequality influenced those practices.

## 101 **Theoretical framework**

102 The Socio-Ecological Model (SEM) has been applied to this study to assess MHV in  
103 rural areas of Sindh, Pakistan. This model has been used extensively to understand individuals'  
104 behaviours about health [15, 16, 17]. According to SEM, an individual has a reciprocal  
105 relationship with their environment. The model acknowledges social, cultural, and environmental  
106 factors and their associations with biological factors [18]. The model used in this study was

107 borrowed from the [19, 20] ecological model, which consists of four levels influencing the  
108 conditions and behaviours about health. The SEM suggests four levels, i.e., microsystem,  
109 mesosystem, exosystem and macrosystem. It considers the interplay between individuals and  
110 their settings and recognises the dynamic network of factors that shape an individual's behaviour  
111 on the individual, community, and societal levels [21]. SEM is applied to this study to record and  
112 analyse the different barriers women experience at these four levels in accessing ANC services.

113 **Fig 1. Application of (SEM) Socio-Ecological Model to assess maternal health vulnerabilities.**

## 114 **Data collection**

115 For this study, we surveyed 360 households and collected data from 352 women of  
116 reproductive age. Participants who met the inclusion criteria were selected, i.e., a) women of  
117 reproductive age, b) delivered babies within the last two years, and c) residents of rural and less  
118 privileged areas. A well-structured, closed-ended questionnaire was prepared after reviewing the  
119 literature on the subject. The questionnaire included various themes, including demographic  
120 characteristics, child-related variables, and knowledge and practices of ANC-related questions.  
121 The first part included demographic variables such as age, marital status, husband and wife's  
122 education, occupation, monthly income, and total number of children. The child-related factors  
123 were also included in the first part, such as the child who died after birth (yes/no), the number of  
124 children who died after birth, the cause of child mortality, and the age of the children at death.  
125 The second part included a 24-item scale which included questions related to knowledge and  
126 practices of ANC among women.

## 127 **Ethical approval**

128           The Research Ethics Committees of Aga Khan University, Karachi, and Sheffield Hallam  
129 University approved this study. We followed all ethical protocols mentioned in the proposal  
130 during the data collection. For example, prior informed and verbal consent was sought from the  
131 participants as most of the women (49%) were not literate at all, and 19% had only primary-level  
132 education. All the participants were briefed about the study before collecting the data. They were  
133 assured of keeping their identity confidential and anonymising all identifiable information.

## 134 **Statistical analysis**

135           Data was analysed using SPSS version 24. This study carried out three variables,  
136 comprised of 24 questions in which demographic, descriptive reliability and regression  
137 techniques were used to test the hypotheses.

## 138 **Results**

### 139 **Descriptive Analysis**

140 Table 1 summarises the demographic characteristics of the study participants. Out of the 352  
141 women of reproductive age, most (21%) belonged to the age group of 18-22, 22% were between  
142 23-27, 24% were between 28-32, and 18% belonged to the age group of 33-37. The marital  
143 status variable was taken as married, divorced, or widowed.

144

145

146 **Table 1. Demographics of participants and child-related factors.**

| Variable             | Category         | Total N=352 (100%) |                |
|----------------------|------------------|--------------------|----------------|
|                      |                  | Frequency (n)      | Percentage (%) |
| Age                  | 18-22            | 73                 | 20.7           |
|                      | 23-27            | 77                 | 21.9           |
|                      | 28-32            | 85                 | 24.1           |
|                      | 33-37            | 63                 | 17.9           |
|                      | 38-42            | 31                 | 8.8            |
|                      | 43-above         | 23                 | 6.5            |
|                      | <b>Total</b>     | <b>352</b>         |                |
| Marital status       | Married          | 310                | 88.1           |
|                      | Divorced         | 34                 | 9.7            |
|                      | Widow            | 8                  | 2.3            |
|                      | <b>Total</b>     | <b>352</b>         |                |
| Education            | Not literate     | 173                | 49.1           |
|                      | Primary          | 66                 | 18.8           |
|                      | Secondary        | 20                 | 5.7            |
|                      | Matric           | 23                 | 6.5            |
|                      | Intermediate     | 15                 | 4.3            |
|                      | Bachelors        | 23                 | 6.5            |
|                      | Masters          | 32                 | 9.1            |
|                      | <b>Total</b>     | <b>352</b>         |                |
| Husband's education  | Not literate     | 108                | 30.7           |
|                      | Primary          | 48                 | 13.6           |
|                      | Secondary        | 45                 | 12.8           |
|                      | Matric           | 32                 | 9.1            |
|                      | Intermediate     | 18                 | 5.1            |
|                      | Bachelors        | 32                 | 9.1            |
|                      | Masters          | 69                 | 19.6           |
| <b>Total</b>         | <b>352</b>       |                    |                |
| Occupation           | Animal Husbandry | 80                 | 22.7           |
|                      | Craftsmanship    | 83                 | 23.6           |
|                      | House help       | 66                 | 18.8           |
|                      | Stitching        | 59                 | 16.8           |
| <b>Total</b>         | <b>352</b>       |                    |                |
| Husband's occupation | Formal job       | 80                 | 22.7           |
|                      | Informal job     | 85                 | 24.1           |
|                      | Agriculture      | 71                 | 20.2           |
|                      | Animal Husbandry | 65                 | 18.5           |
|                      | Jobless          | 51                 | 14.5           |
| <b>Total</b>         | <b>352</b>       |                    |                |



|                                            |                      |            |      |
|--------------------------------------------|----------------------|------------|------|
| <b>The monthly income of the family</b>    | 5k-10k               | 35         | 9.9  |
|                                            | 11k-15k              | 38         | 10.8 |
|                                            | 16k-20k              | 44         | 12.5 |
|                                            | 21k-25k              | 70         | 19.9 |
|                                            | 26k-30k              | 74         | 21   |
|                                            | 31-above             | 91         | 25.9 |
|                                            | <b>Total</b>         | <b>352</b> |      |
| <b>Total number of children</b>            | 2-Jan                | 89         | 25.3 |
|                                            | 4-Mar                | 163        | 46.3 |
|                                            | 6-May                | 62         | 17.6 |
|                                            | 7-above              | 38         | 10.8 |
|                                            | <b>Total</b>         | <b>352</b> |      |
| <b>Child related factors</b>               |                      |            |      |
| <b>Children died after birth</b>           | Yes                  | 119        | 33.8 |
|                                            | No                   | 233        | 66.2 |
| <b>Total</b>                               | <b>352</b>           |            |      |
| <b>Number of children died after birth</b> | One                  | 21         | 17.6 |
|                                            | Two                  | 85         | 71.4 |
|                                            | Three                | 10         | 8.4  |
|                                            | Four                 | 3          | 2.5  |
|                                            | <b>Total</b>         | <b>119</b> |      |
| <b>Cause of child mortality</b>            | Pneumonia            | 45         | 37.8 |
|                                            | Diarrhea             | 33         | 27.7 |
|                                            | Malaria              | 29         | 24.4 |
|                                            | Congenital anomalies | 4          | 3.4  |
|                                            | Malnourishment       | 8          | 6.7  |
|                                            | <b>Total</b>         | <b>119</b> |      |
| <b>Age of children at death</b>            | 1-2 months           | 39         | 32.8 |
|                                            | 3-4 months           | 23         | 19.3 |
|                                            | 5-6 months           | 26         | 21.8 |
|                                            | 7-8 months           | 14         | 11.8 |
|                                            | 9-10 months          | 10         | 8.4  |
|                                            | 11-12 months         | 7          | 5.9  |
|                                            | <b>Total</b>         | <b>348</b> |      |

## 147 **Reliability**

148 The reliability of the knowledge and practices questionnaire was assessed by using Cronbach's  
 149 alpha. Table 2 represents the cumulative alpha value as .844, suggesting a relatively acceptable  
 150 internal consistency as the Cronbach alpha results at 0.7 and 0.8 are considered excellent. All the

151 items had corrected item-total correlations. However, .95 or greater values are creating a  
 152 disturbance in internal consistency [22]. The Cronbach alpha value exists between 0-1.

153 **Table 2. Corrected item-total correlation and Cronbach's alpha values of the 24 items of**  
 154 **Knowledge and Practices of ANC.**

| <b>Item-Total Statistics</b>                                                       | <b>Scale Mean if Item Deleted</b> | <b>Scale Variance if Item Deleted</b> | <b>Corrected Item-Total Correlation</b> | <b>Cronbach's Alpha if Item Deleted</b> |
|------------------------------------------------------------------------------------|-----------------------------------|---------------------------------------|-----------------------------------------|-----------------------------------------|
| <b>I have less consumption of milk during my last pregnancy.</b>                   | 123.8182                          | 329.112                               | 0.225                                   | 0.843                                   |
| <b>I did not take a proper diet during my last pregnancy.</b>                      | 124.4176                          | 325.281                               | 0.315                                   | 0.841                                   |
| <b>I have to ask for money needed for my treatment from my husband.</b>            | 124.1506                          | 329.325                               | 0.203                                   | 0.844                                   |
| <b>I am exposed to violence due to my husband's unemployment during pregnancy.</b> | 124.3324                          | 327.288                               | 0.253                                   | 0.842                                   |
| <b>My household responsibilities do not change during pregnancy.</b>               | 124.1903                          | 330.616                               | 0.156                                   | 0.845                                   |
| <b>Household responsibilities quickly made me tired during pregnancy.</b>          | 124.2102                          | 307.158                               | 0.573                                   | 0.833                                   |
| <b>I prefer homebirths due to the lack of money.</b>                               | 124.3097                          | 310.14                                | 0.495                                   | 0.835                                   |
| <b>Healthcare facilities are affordable in government hospitals.</b>               | 123.8324                          | 315.815                               | 0.432                                   | 0.837                                   |
| <b>Access to standard healthcare services is difficult.</b>                        | 124.2301                          | 303.511                               | 0.606                                   | 0.831                                   |
| <b>The source of water and access to sanitation is poor.</b>                       | 124.0256                          | 307.119                               | 0.586                                   | 0.832                                   |
| <b>I get permission to visit the hospital from my husband during pregnancy.</b>    | 124.2216                          | 308.264                               | 0.531                                   | 0.834                                   |

|                                                                                                                         |          |         |                               |       |
|-------------------------------------------------------------------------------------------------------------------------|----------|---------|-------------------------------|-------|
| <b>I do not know much about modern healthcare facilities.</b>                                                           | 124.25   | 305.556 | 0.552                         | 0.833 |
| <b>My husband decides about family planning.</b>                                                                        | 124.0653 | 307.457 | 0.559                         | 0.833 |
| <b>I do not seek healthcare facilities during pregnancy if there is no companion.</b>                                   | 124.2585 | 309.098 | 0.508                         | 0.835 |
| <b>I do not make the decision as to which hospital to go to for a checkup during pregnancy.</b>                         | 123.6932 | 331     | 0.197                         | 0.844 |
| <b>I cannot visit the health facility alone due to distance.</b>                                                        | 123.4233 | 324.456 | 0.362                         | 0.84  |
| <b>I have to take public transportation to visit healthcare. Facility, but there is often a lack of transportation.</b> | 123.2869 | 332.427 | 0.133                         | 0.846 |
| <b>I do not have post-delivery follow-up support.</b>                                                                   | 124.0057 | 319.345 | 0.351                         | 0.84  |
| <b>High-quality health services are not present in public hospitals.</b>                                                | 124.1193 | 320.613 | 0.314                         | 0.841 |
| <b>The pressure to have a son makes my pregnancies difficult.</b>                                                       | 123.3835 | 323.565 | 0.376                         | 0.839 |
| <b>I was unable to read the brochures given by doctors about maternal healthcare during pregnancy.</b>                  | 123.2131 | 320.704 | 0.45                          | 0.838 |
| <b>I do not know different methods of contraception.</b>                                                                | 123.2699 | 326.044 | 0.303                         | 0.841 |
| <b>I was unaware of the significance of multivitamins during pregnancy.</b>                                             | 123.2131 | 320.362 | 0.429                         | 0.838 |
| <b>Men in the family are not concerned about women's health during pregnancy.</b>                                       | 123.8381 | 341.515 | -0.065                        | 0.852 |
|                                                                                                                         |          |         | <b>Cronbach's alpha 0.844</b> |       |

155

## 156 **Regression Analysis**

157 Table 3 represents the model summary and ANOVA results. The model summary shows the  
 158 strength of the relationship between the model and the dependent variable, namely the model's

159 fitness, which is 44.90%. In this connection, several factors leading to maternal and perinatal  
 160 health vulnerabilities include poverty and gender inequality. However, there is a significant  
 161 variance between MHV and gender inequality and poverty. 05 p-value is a cutoff value that  
 162 shows the possibility of acceptance of the null hypothesis. MHV and gender inequality and  
 163 poverty are two separate things, but they are interdependent in the context of women.

164 **Table 3. The Multiple Regression Analysis (Model summary and ANOVA)**

| Model Summary |                   |          |                   |                            |                   |
|---------------|-------------------|----------|-------------------|----------------------------|-------------------|
|               | R                 | R Square | Adjusted R Square | Std. Error of the Estimate |                   |
|               | .672 <sup>a</sup> | 0.452    | 0.449             | 0.74240223                 |                   |
| ANOVA         |                   |          |                   |                            |                   |
|               | Sum of Squares    | df       | Mean Square       | F                          | Sig.              |
| Regression    | 158.645           | 2        | 79.322            | 143.919                    | .000 <sup>b</sup> |
| Residual      | 192.355           | 349      | 0.551             |                            |                   |
| Total         | 351               | 351      |                   |                            |                   |

165 a. Predictors: (Constant), Gender Inequality, Poverty.  
 166 b. Dependent Variable: Maternal Health Vulnerabilities.

167 Table 4 represents the results of regression Coefficients, showing the significant level of poverty  
 168 and gender inequality in the prediction of MHV. The Beta value shows the contribution of each  
 169 independent variable separately. In this study, poverty predicts MHV positive and significant  
 170 (65.60% and .000). In contrast, gender inequality predicts MHV positive and significant (10.50%  
 171 and .000). Thus, in MHV, gender inequality and poverty are two different terms that tend to  
 172 complement each other by acting as risk or protective factors, respectively, both at the individual  
 173 level and at the health system—further sig. Values also explain the status of hypotheses H1 and  
 174 H2, which are supported in the study.

175 **Table 4. Unstandardised and standardised Coefficients.**

| Coefficients |  |
|--------------|--|
|--------------|--|

|            | <b>Unstandardised Coefficients</b> | <b>Std. Error</b> | <b>Standardised Coefficients</b> | <b>t</b> | <b>Sig.</b> |
|------------|------------------------------------|-------------------|----------------------------------|----------|-------------|
| (Constant) | -5.92E-17                          | 0.04              |                                  | 0        | 1           |
| Poverty    | 0.656                              | 0.04              | 0.656                            | 16.517   | 0           |
| Gender     |                                    |                   |                                  |          |             |
| Inequality | 0.105                              | 0.04              | 0.105                            | 2.637    | 0.009       |

## 176 **Discussion and conclusion**

177 Reducing maternal mortality has become a global health priority as it affects women  
178 disproportionately in low and middle-income countries. Many of these deaths are preventable  
179 [23]. Maternal health has become a challenge for Pakistan, which faces a maternal health crisis  
180 with a high MMR. The prevalent societal beliefs and perceptions, household power structures  
181 and misinformation significantly impact maternal health [24]. The results of this study reveal that  
182 different levels within the SEM influence factors affecting maternal health vulnerabilities. These  
183 factors include sociodemographic characteristics of the women and social and community  
184 aspects.

185 Women's vulnerabilities in rural areas begin from the micro and mesosystem: poverty, gender  
186 inequality, and cultural practices disempower women and pose numerous barriers to enhancing  
187 their social status. The women lack education and awareness about reproductive health. This is  
188 even though education and awareness about reproductive and maternal health can play a central  
189 role in smoothing ANC, which is central to promoting a positive pregnancy experience and  
190 improving maternal and child survival [25]. The critical steps of ANC include risk diagnosis,  
191 pregnancy management and prevention of pregnancy-related diseases, health education and  
192 health promotion [26]. The participants in this study showed a lack of health awareness and  
193 information about ANC. Most participants, i.e., 49%, were not literate, while 19% had primary-  
194 level education. Only 6% of participants had matric, and 4% had intermediate-level education.

195 Thus, most of the women were unable to read and comprehend information about ANC, the use  
196 of contraceptives, the importance of follow-ups, maintaining diet plans, reading and  
197 understanding brochures, knowledge about modern healthcare facilities, and the extent of  
198 contraceptives.

199 Patriarchy, supported by socio-cultural norms, is another element within the micro, meso and  
200 exosystem impacting MHV. In rural areas, the uptake of ANC is widely influenced by social and  
201 cultural norms. Inadequate and poor-quality services and social and cultural orientations limit  
202 women's access to quality maternal health services [4]. Results of this study also reflect that  
203 women's regular visits to healthcare facilities and follow-ups were greatly influenced by the  
204 distance of the health facility from their residence; a more significant distance complicated the  
205 situation further. Since men make substantial decisions, women's access to ANC services was  
206 also subject to men's approval.

207 Women's low status, poverty, limited literacy, and inaccessible, inadequate and costly healthcare  
208 services influence MHV [27]. Results of this study show that poverty is the main factor  
209 influencing ANC practices in the villages; the women in this study were less likely to maintain  
210 the healthy diet required during pregnancy due to financial constraints such as milk consumption,  
211 proper food, or vitamin intake. Women also preferred home delivery because their families could  
212 not afford hospital expenses. Poverty is a significant factor in the micro, meso, and exosystems  
213 of SEM that influence MHV.

214 The growing population and poor maternal health outcomes in Pakistan require immediate  
215 response and improved strategies. For example, gains cannot be made by investing in the health  
216 sector alone; social indicators of women also need close attention. Fundamental issues about

217 women's status, empowerment, education, hygiene and sanitation must also be considered [28,  
218 29].

219 There is a lack of gender-sensitive policies and initiatives on the macro level to address MHV in  
220 rural areas and remote communities where women are in disadvantageous positions. Maternal  
221 health outcomes can be improved with robust interventions targeted to reduce gender inequality  
222 in accessing healthcare. The World Health Organization has set a goal to decrease the global  
223 MMR to 70 maternal deaths per 100,000 live births by 2030 [30]. For this, WHO is working to  
224 record maternal mortality through increased research evidence, setting global standards,  
225 providing evidence-based clinical and pragmatic guidance, and giving technical support to  
226 member countries in developing and implementing effective policies and programs [4].  
227 Moreover, pregnancy-related awareness programs, the provision of skilled birth attendants and  
228 access to antenatal care contribute to safer pregnancies and childbirth. To address the needs and  
229 priorities of women and girls, inequalities must be removed in accessing quality reproductive,  
230 maternal, and healthcare services for newborn children, along with the factors causing maternal  
231 mortalities, morbidities, and related disabilities.

232 The SEM helped to enhance an understanding of how different factors at personal, community  
233 and societal levels influence individuals' health-seeking behaviour and increase vulnerabilities.  
234 This study concludes that gender inequality and poverty are well entrenched in rural areas,  
235 resulting in poor ANC practices. We suggest addressing the needs and priorities of the women  
236 residing in less privileged areas. This can only be possible if socio-economic and geographical  
237 factors are considered and women are given improved access to financial and physical resources.  
238 This study is limited to some villages in northern Sindh; more research on MHV is required in

239 other less privileged areas of Pakistan where patriarchy is well entrenched and women's access  
240 to public spheres is restricted.

241 **Disclaimer:** None

242 **Conflict of interest:** None

243 **Acknowledgement:** We would like to thank our funders, the Academy of Medical  
244 Sciences UK, for their support of the study and Dr Zahid Memon for helping us obtain ethics  
245 approval.

## 246 **References**

- 247 1. Sule F. A., Uthman, O. A., Olamijuwon, E. O., Ichehgo, N. K., Mgbachi, I. C.,  
248 Okusanya, B., & Makinde, O. A. (2022). Examining vulnerability and resilience in  
249 maternal, newborn and child health through a gender lens in low-income and middle-  
250 income countries: a scoping review. *BMJ Global Health*, 7 (4), p. e007426.  
251 [https://doi: 10.1186/s12961-015-0036-5](https://doi.org/10.1186/s12961-015-0036-5).
- 252 2. WHO (2023). Maternal mortality. Geneva, Switzerland. Available at  
253 <https://www.who.int/news-room/fact-sheets/detail/maternal-mortality> (Accessed 2 May  
254 2023)
- 255 3. Alkema, L., Chou, D., Hogan, D., Zhang, S., Moller, A.B., Gemmill, A., & Say, L.  
256 (2016). Global, regional, and national levels and trends in maternal mortality between  
257 1990 and 2015, with scenario-based projections to 2030: a systematic analysis by the UN



- 258 Maternal Mortality Estimation Inter-Agency Group. *The Lancet*, 387, No. 10017, 462–  
259 474. [http://dx.doi.org/10.1016/S0140-6736\(15\)00838-7](http://dx.doi.org/10.1016/S0140-6736(15)00838-7).
- 260 4. WHO (2019). Maternal mortality. Geneva, Switzerland. Available at  
261 <https://apps.who.int/iris/bitstream/handle/10665/329886/WHO-RHR-19.20-eng.pdf>.  
262 (Accessed 12 March 2023)
- 263 5. UNICEF (2020). Maternal mortality: Data and statistics. New York, USA. Available at:  
264 [https://gdc.unicef.org/resource/maternal-](https://gdc.unicef.org/resource/maternal-mortality#:~:text=Sub%2DSaharan%20Africans%20suffer%20from,maternal%20deaths%20per%20year%20worldwide)  
265 [mortality#:~:text=Sub%2DSaharan%20Africans%20suffer%20from,maternal%20deaths](https://gdc.unicef.org/resource/maternal-mortality#:~:text=Sub%2DSaharan%20Africans%20suffer%20from,maternal%20deaths%20per%20year%20worldwide)  
266 [%20per%20year%20worldwide](https://gdc.unicef.org/resource/maternal-mortality#:~:text=Sub%2DSaharan%20Africans%20suffer%20from,maternal%20deaths%20per%20year%20worldwide) (Accessed 12 February 2023)
- 267 6. UNICEF (2009). The State of the World’s Children 2009: Maternal and Newborn Health.  
268 (United Nations publication, Sales No. E.09.XX.1), New York, USA. Available at  
269 <https://www.unicef.org/media/84866/file/SOWC-2009.pdf> (Accessed 23 March 2023)
- 270 7. Hanif, M., Khalid, S., Rasul, A., & Mahmood, K. (2021). Maternal mortality in rural  
271 areas of Pakistan: challenges and prospects. *Rural Health*, 27, 1040–1047. [https://doi:](https://doi.org/10.5772/intechopen.96934)  
272 [10.5772/intechopen.96934](https://doi.org/10.5772/intechopen.96934).
- 273 8. Bhutta, Z. A., Hafeez, A., Rizvi, A., Ali, N., Khan, A., Ahmad, F., & Jafarey, S. N.  
274 (2013). Reproductive, maternal, newborn, and child health in Pakistan: challenges and  
275 opportunities. *The Lancet*, 381, No. 9884, 2207–2218. [https://doi: 10.1016/S0140-](https://doi.org/10.1016/S0140-6736(12)61999-0)  
276 [6736\(12\)61999-0](https://doi.org/10.1016/S0140-6736(12)61999-0).
- 277 9. Pakistan Maternal Mortality Survey (2019). National Institute of Population Studies  
278 (NIPS) [Pakistan] and ICF. 2020: Key Indicators Report. Islamabad, Pakistan, and

- 279 Rockville, Maryland, USA. NIPS and ICF. Available at:  
280 <https://dhsprogram.com/pubs/pdf/SR267/SR267.pdf>.
- 281 10. Roos, N., Kovats, S., Hajat, S., Filippi, V., Chersich, M., Luchters, S., & Wright, C. Y.  
282 (2021). Maternal and newborn health risks of climate change: a call for awareness and  
283 global action. *Acta obstetricia et gynecologica Scandinavica*, 100 (4), 566–570.  
284 <https://doi.org/10.1111/aogs.14124>.
- 285 11. World Bank (2004). The Millennium Development Goals for Health: Rising to the  
286 Challenges”, Washington, DC, World Bank, pp. xi, 6, 51 and 52. Available at: The  
287 Millennium Development Goals for Health: Rising to the Challenges ([worldbank.org](http://worldbank.org))  
288 (Accessed 22 March 2023)
- 289 12. WHO (2018). WHO Recommendations on Antenatal Care for a Positive Pregnancy  
290 Experience: Summary Highlights and Key Messages from the World Health  
291 Organization’s 2016 Global Recommendations for Routine Antenatal Care. Available at  
292 <https://apps.who.int/iris/bitstream/handle/10665/259947/WHO-RHR-18.02-eng.pdf>  
293 (Accessed 2 May 2023)
- 294 13. WHO (2021a). Why we need to focus on quality care for women and newborns. Geneva,  
295 Switzerland. Available at: [https://www.who.int/news/item/04-05-2021-why-we-need-to-](https://www.who.int/news/item/04-05-2021-why-we-need-to-focus-on-quality-care-for-women-and-newborns)  
296 [focus-on-quality-care-for-women-and-newborns](https://www.who.int/news/item/04-05-2021-why-we-need-to-focus-on-quality-care-for-women-and-newborns) (Accessed 23 January 2023)
- 297 14. Jimenez Soto, E., La Vincente, S., Clark, A., Firth, S., Morgan, A., Dettrick, Z.,  
298 & Widiati, Y. (2013). Investment case for improving maternal and child health: results  
299 from four countries. *BMC Public Health*, 13 (1), 1–14. [https://doi.org/10.1186/1471-2458-13-](https://doi.org/10.1186/1471-2458-13-601)  
300 601

- 301 15. Townsend, N., & Foster, C. (2013). Developing and applying a socio-ecological model to  
302 the promotion of healthy eating in the school. *Public Health Nutrition*, 16 (6), 1101–  
303 1108. [https://doi:10.1017/S1368980011002655](https://doi.org/10.1017/S1368980011002655).
- 304 16. Sallis, J. F., Owen, N., & Fisher, E. (2015). Ecological models of health  
305 behaviour. *Health behaviour: Theory, research, and practice*, 5, 43–64.
- 306 17. Centers for Disease Control and Prevention (CDC) (2022). The Social-Ecological Model:  
307 A Framework for Prevention. Available at: The Social-Ecological Model: A Framework  
308 for Prevention |Violence Prevention|Injury Center|CDC (Accessed 20 July 2023)
- 309 18. Salihu, H. M., Wilson, R. E., King, L. M., Marty, P. J., & Whiteman, V. E. (2015).  
310 Socio-ecological model as a framework for overcoming barriers and challenges in  
311 randomised control trials in minority and underserved communities. *International*  
312 *Journal of MCH and AIDS*, 3 (1), p. 85.
- 313 19. Bronfenbrenner, U. (1979). The ecology of human development: Experiments by nature  
314 and design. *Harvard University Press*.
- 315 20. Bronfenbrenner U (1977). Toward an experimental ecology of human development.  
316 *American Psychologist*, 32(7), 513–531.
- 317 21. Martínez-Andrés, M., Bartolomé-Gutiérrez, R., Rodríguez-Martín, B., Pardo-Guijarro,  
318 M. J., Garrido-Miguel, M., & Martínez-Vizcaíno, V. (2020). Barriers and facilitators to  
319 leisure physical activity in children: a qualitative approach using the socio-ecological  
320 model. *International Journal of Environmental Research and Public Health*, 17 (9), p.  
321 3033. [https://doi: 10.3390/ijerph17093033](https://doi.org/10.3390/ijerph17093033).

- 322 22. Hulin, C. (2001). Can a reliability coefficient be too high? *Journal of Consumer*  
323 *Psychology*, (1–2), p. 55. [https://doi:10.2307/1480474](https://doi.org/10.2307/1480474).
- 324 23. Ozimek, J. A., & Kilpatrick, S. J. (2018). Maternal mortality in the twenty-first  
325 century. *Obstetrics and Gynecology Clinics*, 45 (2), 175–186.  
326 [https://doi: 10.1016/j.ogc.2018.01.004](https://doi.org/10.1016/j.ogc.2018.01.004).
- 327 24. Mustafa, M., Batool, A., Fatima, B., Nawaz, F., Toyama, K., & Raza, A.A. (2020).  
328 Patriarchy, maternal health and spiritual healing: Designing maternal health interventions  
329 in Pakistan. In *Proceedings of the 2020 CHI Conference on Human Factors in*  
330 *Computing Systems*, 1–13. <https://doi.org/10.1145/3313831.3376294>.
- 331 25. Kumar, G., Choudhary, T.S., Srivastava, A., Upadhyay, R.P., Taneja, S., Bahl, R., &  
332 Mazumder, S. (2019). Utilisation, equity and determinants of full antenatal care in India:  
333 analysis from the National Family Health Survey 4. *BMC Pregnancy and Childbirth*, 19  
334 (1), 1–9. <https://doi.org/10.1186/s12884-019-2473-6>.
- 335 26. WHO (2016). WHO recommendations on antenatal care for a positive pregnancy  
336 experience: summary. Geneva, Switzerland. Available at:  
337 [https://apps.who.int/iris/bitstream/handle/10665/250796/9789241549912-](https://apps.who.int/iris/bitstream/handle/10665/250796/9789241549912-eng.pdf?sequence=1)  
338 [eng.pdf?sequence=1](https://apps.who.int/iris/bitstream/handle/10665/250796/9789241549912-eng.pdf?sequence=1) (Accessed 12 March 2023)
- 339 27. WHO (2014). Maternal Mortality, Fact sheet. Geneva, Switzerland. Available at  
340 [https://apps.who.int/iris/bitstream/handle/10665/112318/WHO\\_RHR\\_14.06\\_eng.pdf](https://apps.who.int/iris/bitstream/handle/10665/112318/WHO_RHR_14.06_eng.pdf)  
341 (Accessed 22 February 2023)

- 342 28. Bhutta, Z.A., & Hafeez, A. (2015). What can Pakistan do to address maternal and child  
343 health over the next decade? *Health Research Policy and Systems*, 13 (1), 13–16.  
344 [https://doi 10.1186/s12961-015-0036-5](https://doi.org/10.1186/s12961-015-0036-5).
- 345 29. Requejo, J.H., & Bhutta, Z.A. (2015). The post-2015 agenda: staying the course in  
346 maternal and child survival. *Archives of disease in childhood*, 100 (Suppl 1), S76–S81.  
347 [https://doi: 10.1136/archdischild-2013-305737](https://doi.org/10.1136/archdischild-2013-305737).
- 348 30. WHO (2021b). New global targets to prevent maternal deaths. Available at:  
349 [https://www.who.int/news/item/05-10-2021-new-global-targets-to-prevent-maternal-](https://www.who.int/news/item/05-10-2021-new-global-targets-to-prevent-maternal-deaths)  
350 [deaths](https://www.who.int/news/item/05-10-2021-new-global-targets-to-prevent-maternal-deaths) (Accessed 13 February 2023).

## The Socio-Ecological Model (SEM) of Maternal Health Vulnerabilities

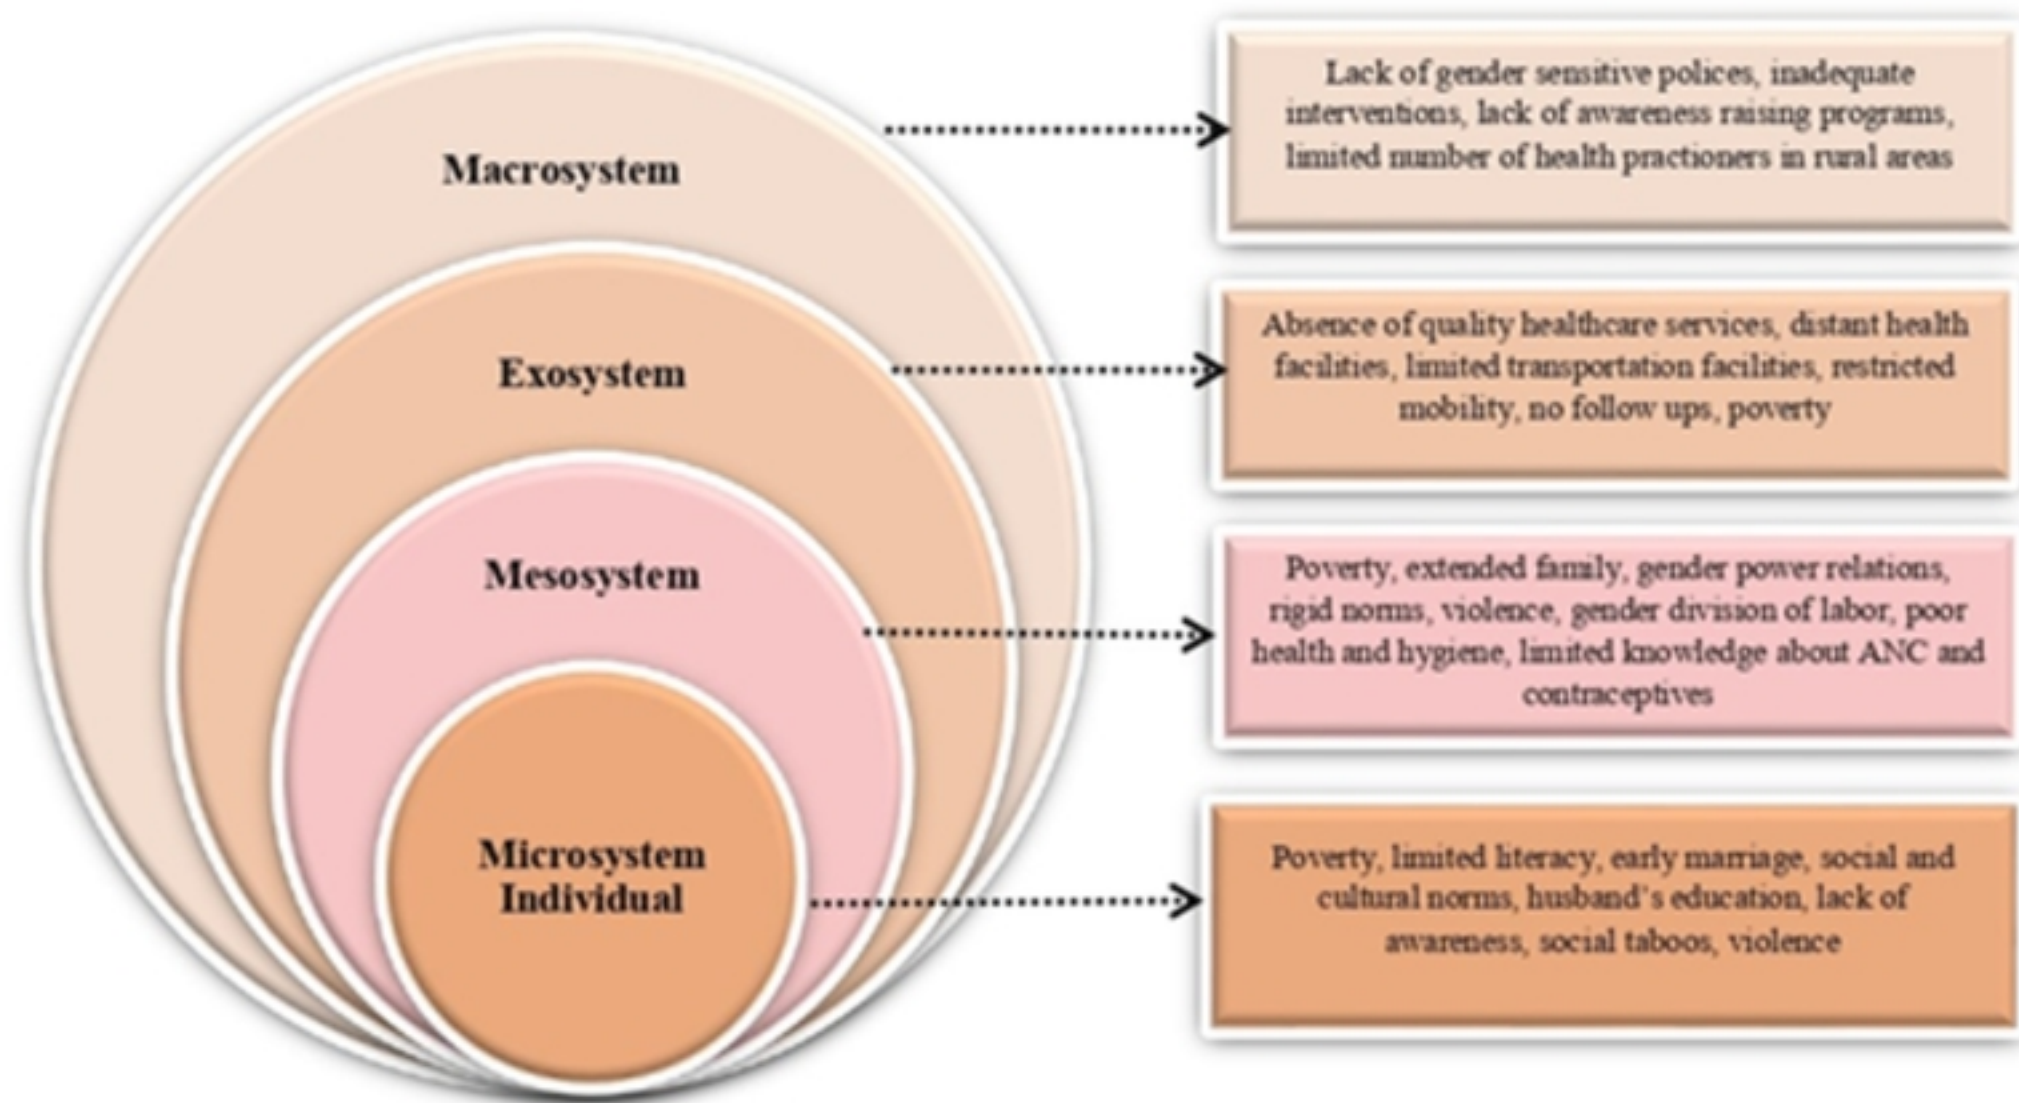

Figure
